# Supplementary material
Source: publisher figshare collection journal article supplement (https://future-science-group.figshare.com/articles/dataset/_/21103702)
Supplement: Supplementary file 1 [file 1]

**Supplementary Table 3.** Microbial strains that have been tested for susceptibility against bionanocatalysts.

| Microorganism | Type | Bionanocatalyst and maximum inhibition zone in parenthesis (mm) | Ref. |
| --- | --- | --- | --- |
| Escherichia coli | Gram-(-) bacteria | Cu/TiO2†, Ag/TiO2 (10), and Ag/TiO2-SiO2 (12) | [113,167,171] |
| Pseudomonas aeruginosa | Gram-(-) bacteria | Ag/TiO2 (11.3) and Ag/TiO2-SiO2 (15) | [167,171] |
| Salmonella typhimurium | Gram-(-) bacteria | Ag/TiO2 (9.7) | [171] |
| Salmonella enterica | Gram-(-) bacteria | Ag/TiO2-SiO2 (11) | [167] |
| Proteus vulgaris | Gram-(-) bacteria | Ag/TiO2 (7.2) and Ag/TiO2-SiO2 (9) | [167,171] |
| Proteus mirabilis | Gram-(-) bacteria | Ag/TiO2-SiO2 (10) | [167] |
| Klebsiella pneumoniae | Gram-(-) bacteria | Ag/TiO2 (10) and Ag/TiO2-SiO2 (11) | [167,171] |
| Shigella dysenteriae | Gram-(-) bacteria | Ag/TiO2 (10.7) | [171] |
| Serratia marcescens | Gram-(-) bacteria | Ag/TiO2 (10.3) | [171] |
| Staphylococcus aureus | Gram-(+) bacteria | Ag/TiO2 (15.3) and Ag/TiO2-SiO2 (12) | [167,171] |
| Staphylococcus epidermis | Gram-(+) bacteria | Ag/TiO2-SiO2 (11) | [167] |
| Enterococcus faecalis | Gram-(+) bacteria | Ag/TiO2-SiO2 (14) | [167] |
| Candida albicans | Yeast | Ag/TiO2 (10.3) and Ag/TiO2-SiO2 (18) | [167,171] |

† Only DNA degradation was tested.
